# Supplementary material for: Carboxylic Acid Functionalization at the Meso-Position of the Bodipy Core and Its Influence on Photovoltaic Performance
Source: MDPI journal article supplement (doi:10.3390/nano9101346), 2019-09-20
Supplement: s2 [file s2]

## Carboxylic Acid Functionalization at the Meso-Position of the Bodipy Core and Its Influence on Photovoltaic Performance

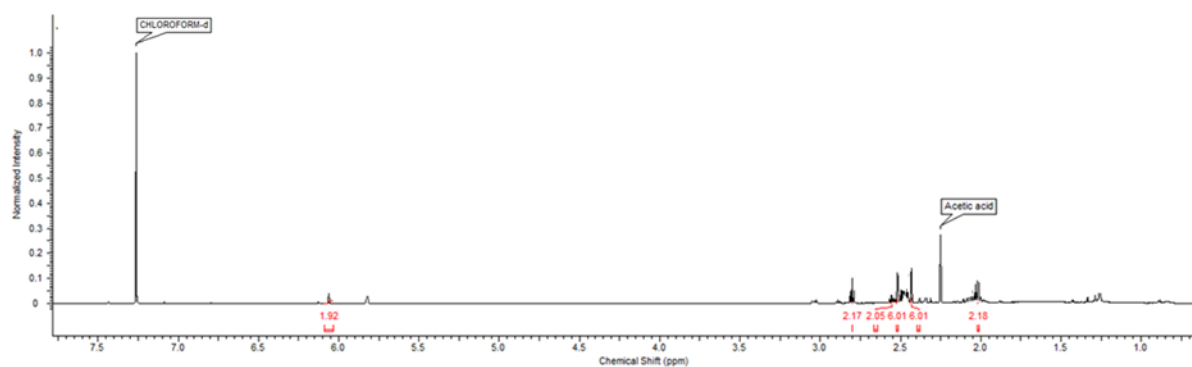

Figure S1.  $^1\text{H}$ -NMR of bodipy dye 1.

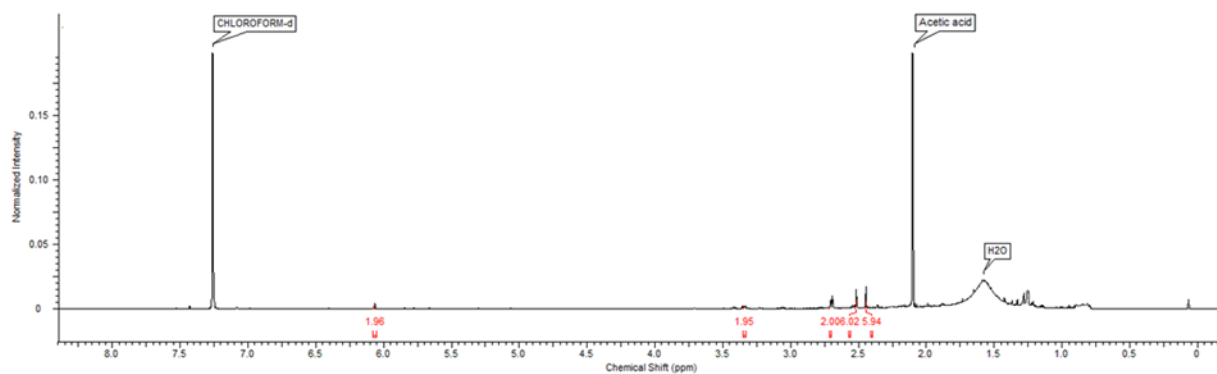

Figure S2.  $^1\text{H}$ -NMR of bodipy dye 2.

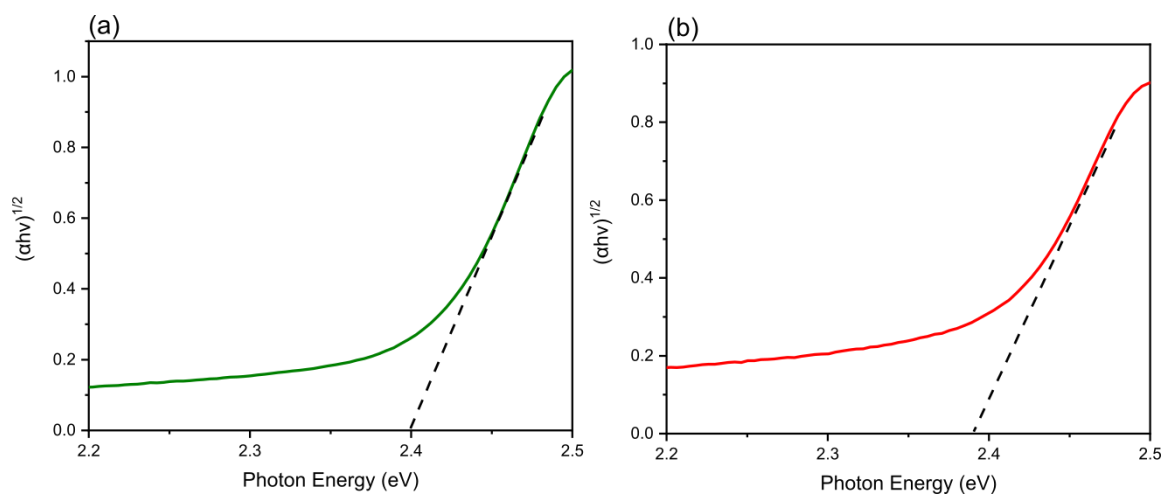

Figure S3. Tauc plots for solutions of bodipy (a) dye 1 and (b) dye 2.

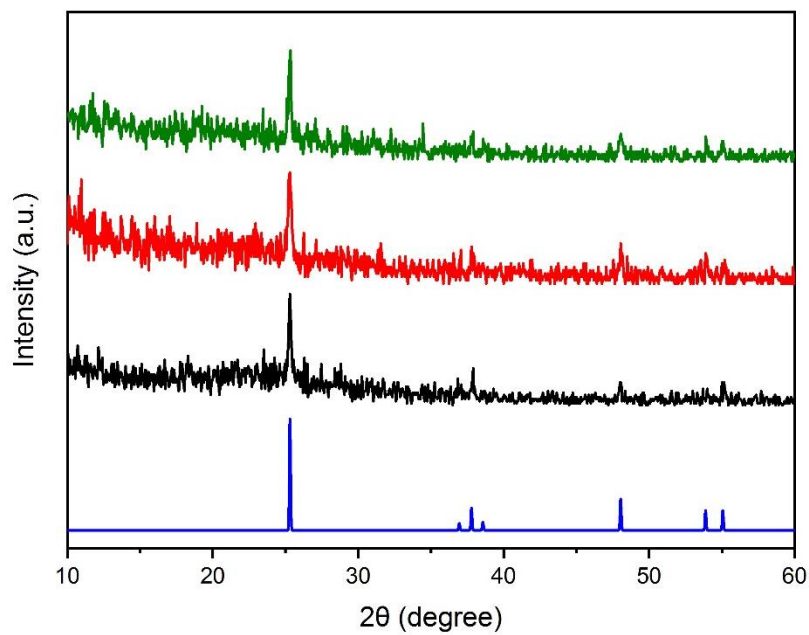

**Figure S4.** XRD patterns for  $\text{TiO}_2$  photoelectrodes that were sensitized with bodipy dye 1 (green) and bodipy dye 2 (red) together with the unsensitized  $\text{TiO}_2$  photoelectrode (black). Standard anatase  $\text{TiO}_2$  phase is shown in blue (bottom).

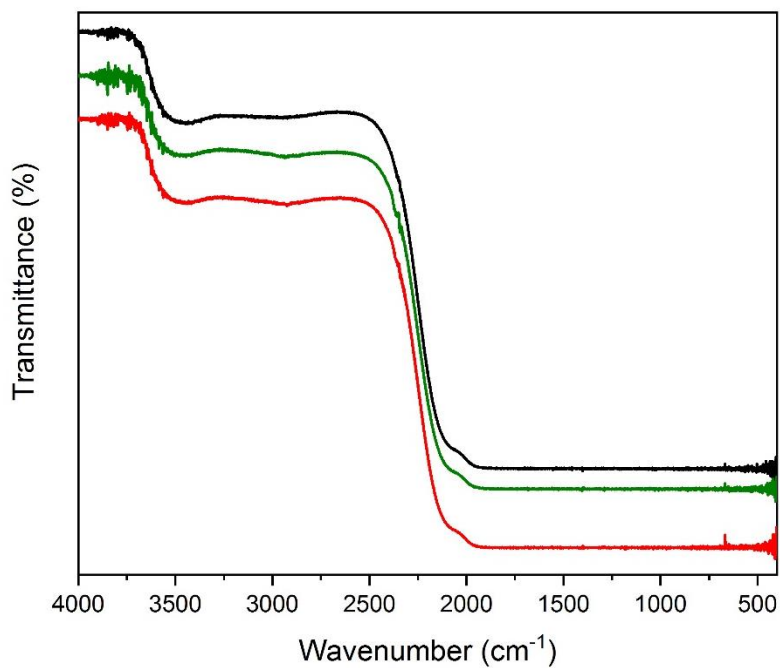

**Figure S5.** FTIR spectra of untreated (black curve) and sensitized  $\text{TiO}_2$  photoelectrodes (green curve represent dye 1 while red curve dye 2).

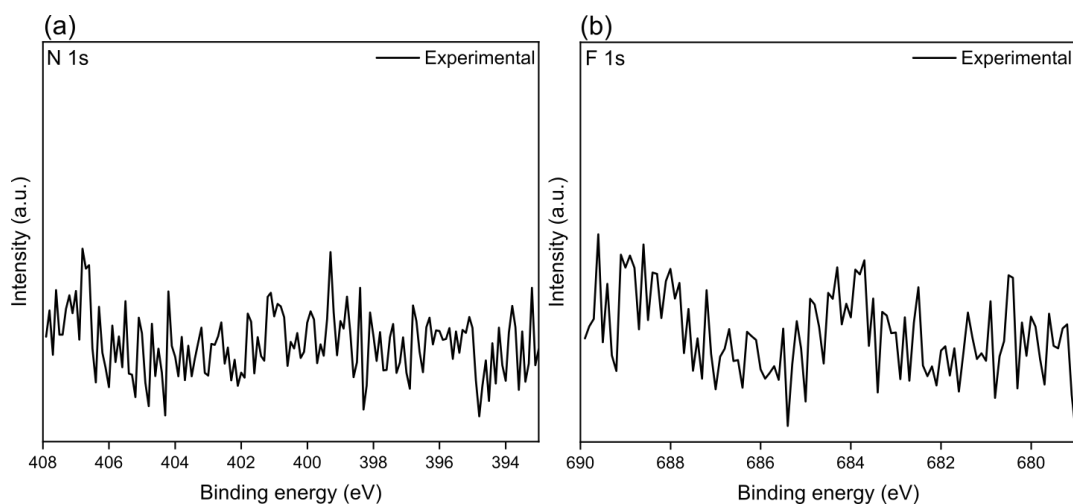

**Figure S6.** The high-resolution (a) N 1s and (b) F 1s XPS spectra for control (unsensitized) TiO<sub>2</sub> photoelectrode.

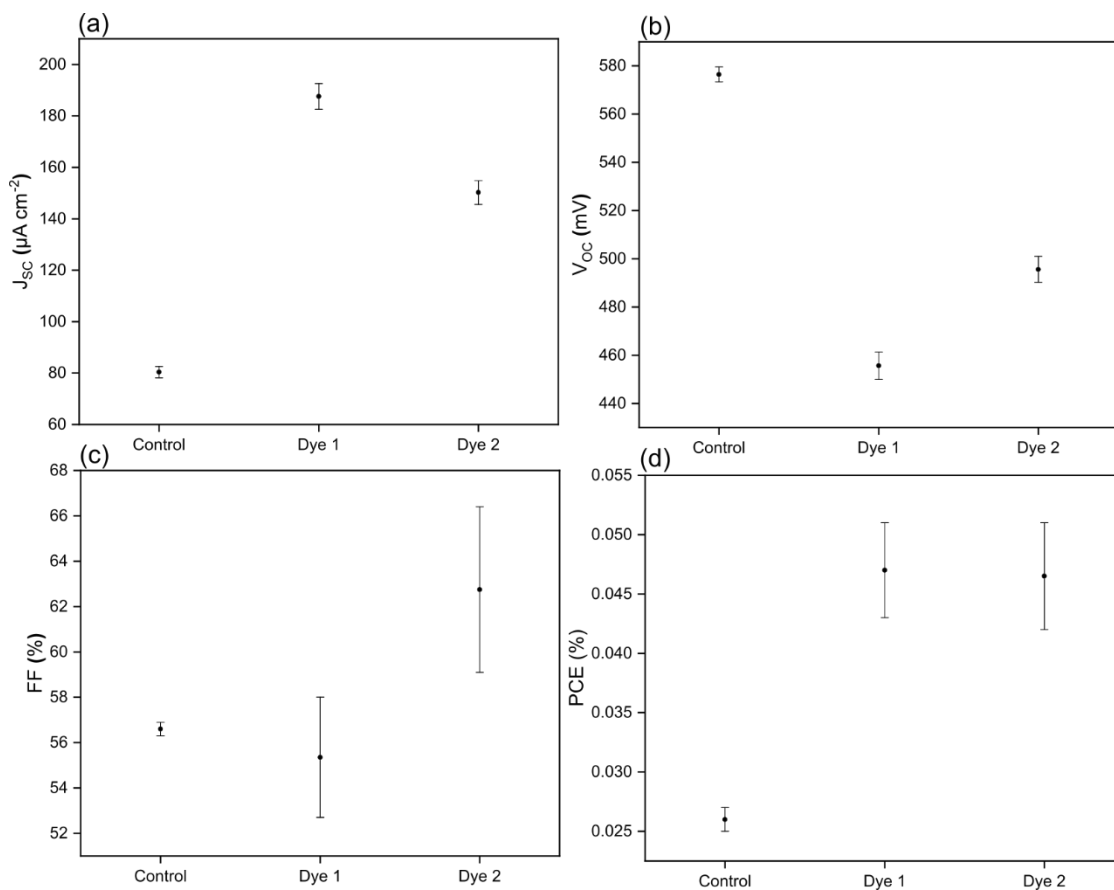

**Figure S7.** Average (a)  $J_{sc}$ , (b)  $V_{oc}$ , (c) FF and (d) power conversion efficiency (PCE) of the fabricated PECs sensitized only with bodipy dye 1 or 2 including a control (unsensitized). The averages were calculated over 2 separate batches of devices and the standard error has been illustrated as error bars.

**Table S1.** FTIR peak wavenumbers and assignments for bodipy dye 1 and 2. The symbols ( $\nu$  and  $\delta$ ) refer to stretching or bending, respectively.

|                                      |             |             |                |             |                |
|--------------------------------------|-------------|-------------|----------------|-------------|----------------|
| Dye 1 wavenumber (cm <sup>-1</sup> ) | 2953        | 1691        | 1407           | 1205        | 915            |
| Dye 2 wavenumber (cm <sup>-1</sup> ) | 2927        | 1680        | 1410           | 1197        | 909            |
| Assignment                           | $\nu$ (C-H) | $\nu$ (C=O) | $\delta$ (O-H) | $\nu$ (C-O) | $\delta$ (O-H) |
